# Supplementary material
Source: Springer Nature journal article supplement (https://www.springermedizin.de/resource/supplementary/13058_2005_1349_MOESM10_ESM.pdf/9698916)

# S-10: 8q Multiple Alignment View

+/-1.0 and +/-0.5 scale bars are included for reference

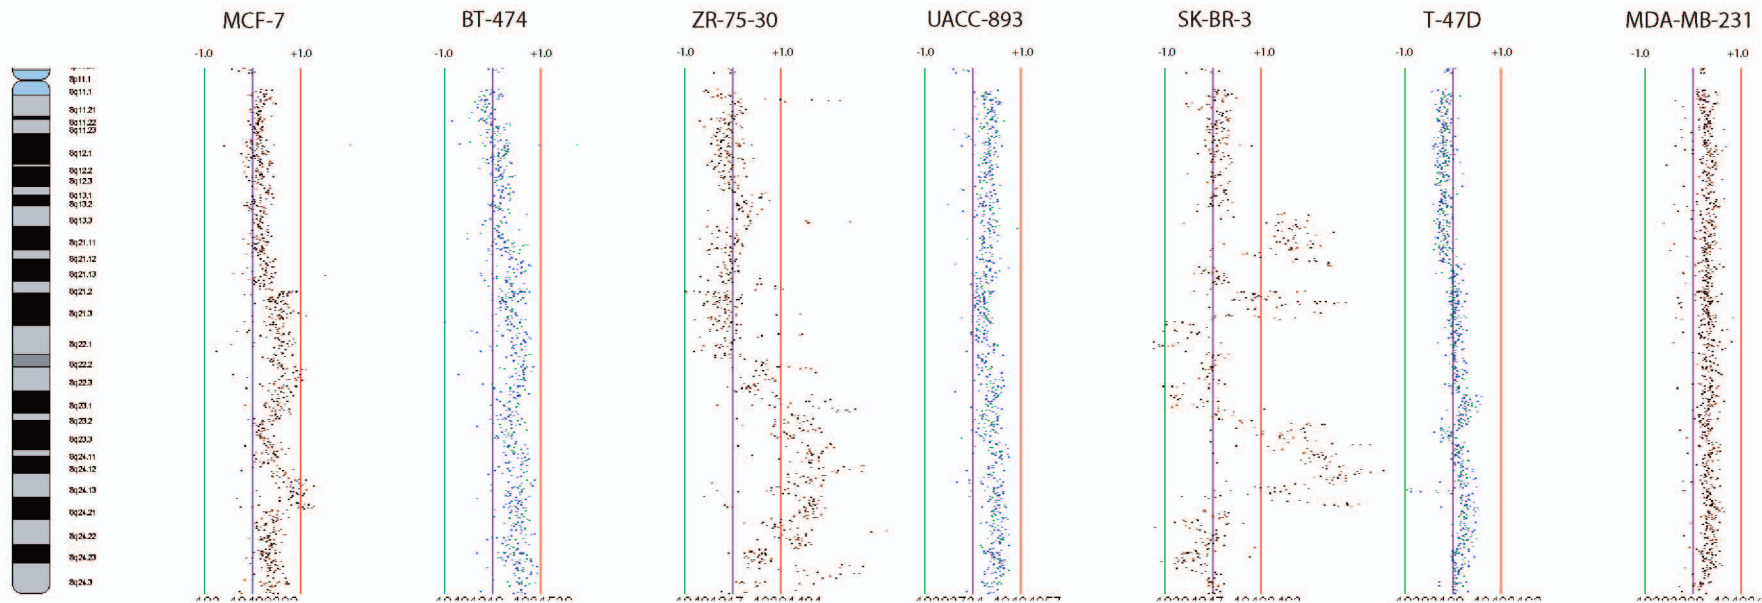

Supplement: MOESM10 [file 9698916]
